# Supplementary material for: Heat Transfer in Porous Low–k Materials: Modeling Based on Fractional Calculus and Material Structure Fractality
Source: Research Square preprint supplement (doi:10.21203/rs.3.rs-8804757/v1), 2026-02-23
Supplement: Supplementary file 1 [file 3f0eedeae870c5849000fb90.xlsx]

## Sheet: FTIR
Wavenumber, cm	Absorbance
	300С	400С	700С
399.199	-0.01092	0.04756	0.0894
401.127	0.04743	0.04832	0.08596
403.056	0.089	0.04966	0.08069
404.984	0.11661	0.05504	0.08053
406.913	0.12675	0.06253	0.08485
408.841	0.12847	0.06868	0.09038
410.77	0.13133	0.07435	0.09727
412.698	0.14268	0.0807	0.10854
414.627	0.17659	0.08788	0.14073
416.555	0.19831	0.09513	0.18686
418.484	0.10375	0.09475	0.14576
420.412	-0.00186	0.08741	0.02331
422.341	0.01112	0.09089	0.00904
424.269	0.04648	0.10271	0.07119
426.198	0.09011	0.11395	0.13593
428.126	0.13404	0.12109	0.17864
430.055	0.15057	0.12507	0.20498
431.983	0.14874	0.12849	0.21987
433.912	0.16313	0.13426	0.23385
435.84	0.19649	0.14062	0.25316
437.769	0.20427	0.14222	0.25923
439.697	0.18062	0.13938	0.24955
441.626	0.15178	0.1376	0.2523
443.554	0.12497	0.13863	0.27833
445.483	0.10981	0.13778	0.29935
447.411	0.11371	0.13339	0.3019
449.34	0.12656	0.12862	0.3035
451.268	0.12721	0.12364	0.31169
453.197	0.11936	0.11539	0.30738
455.125	0.14478	0.10501	0.28386
457.054	0.14463	0.10476	0.28371
458.982	0.13953	0.0956	0.27832
460.911	0.13442	0.08645	0.27293
462.839	0.12932	0.07729	0.26754
464.768	0.09863	0.06364	0.24255
466.696	0.08338	0.05725	0.22827
468.625	0.0552	0.04998	0.19552
470.553	0.00574	0.03896	0.12697
472.482	-0.01623	0.02885	0.07412
474.41	0.01668	0.02618	0.08663
476.339	0.04694	0.02599	0.1121
478.267	0.04602	0.02358	0.11272
480.196	0.03065	0.02103	0.10463
482.124	0.01309	0.01985	0.1014
484.053	0.00947	0.01863	0.099
485.981	0.0248	0.0161	0.09028
487.91	0.03726	0.01289	0.07831
489.838	0.04516	0.01003	0.06937
491.767	0.04973	0.00786	0.06309
493.695	0.03824	0.0066	0.0562
495.624	0.02165	0.00584	0.05025
497.552	0.01577	0.00498	0.05013
499.481	0.01821	0.0051	0.06319
501.409	0.01944	0.00622	0.07989
503.338	0.0152	0.00532	0.06684
505.266	0.0116	0.00226	0.02985
507.195	0.01225	-0.000210033	0.00993
509.123	0.014	-0.00144	0.01444
511.052	0.01291	-0.00213	0.022
512.98	0.01484	-0.00222	0.02557
514.909	0.03057	-0.00116	0.03105
516.837	0.04751	0.000321412	0.03266
518.766	0.04243	0.000547935	0.02079
520.694	0.02513	0.000190091	0.00843
522.623	0.02309	0.000254528	0.00569
524.551	0.04196	6.70115e-05	0.00599
526.48	0.04908	0.000128546	0.00615
528.408	0.02765	0.00122	0.00616
530.337	0.00803	0.00254	0.00571
532.265	0.00317	0.00387	0.00577
534.194	0.00367	0.0052	0.00739
536.122	0.00419	0.00582	0.00914
538.051	0.00456	0.00591	0.00819
539.979	0.00578	0.00596	0.00591
541.908	0.00739	0.00606	0.00621
543.836	0.00732	0.00638	0.00889
545.765	0.00634	0.00644	0.0087
547.693	0.00697	0.00581	0.00317
549.622	0.00761	0.00548	-0.00165
551.55	0.00875	0.00614	0.000529328
553.479	0.0115	0.00707	0.00644
555.407	0.01292	0.00769	0.00956
557.336	0.0125	0.00799	0.00952
559.264	0.01235	0.00815	0.00903
561.193	0.0133	0.00852	0.00928
563.121	0.01432	0.00933	0.01072
565.05	0.01558	0.01036	0.01361
566.978	0.01894	0.0111	0.01449
568.907	0.02083	0.01141	0.01045
570.835	0.01792	0.01143	0.00719
572.764	0.02024	0.01133	0.01153
574.692	0.03142	0.01136	0.02108
576.621	0.03153	0.01152	0.02244
578.549	0.013	0.01173	0.00998
580.478	-0.000561487	0.01205	-0.00161
582.406	0.00435	0.01225	-0.0021
584.335	0.01367	0.01195	0.00222
586.263	0.01517	0.0111	0.0052
588.192	0.01497	0.01051	0.00952
590.12	0.01927	0.01057	0.018
592.049	0.02149	0.01024	0.02276
593.977	0.01775	0.00934	0.01719
595.906	0.01498	0.00842	0.00906
597.834	0.01695	0.00727	0.00432
599.763	0.01907	0.00613	0.00227
601.691	0.01693	0.00545	0.00259
603.62	0.01371	0.00457	0.0043
605.548	0.01265	0.00336	0.0053
607.477	0.01268	0.00277	0.00517
609.405	0.01211	0.00282	0.00484
611.334	0.01098	0.0029	0.0041
613.262	0.01078	0.00327	0.0034
615.191	0.00779	0.00374	0.00289
617.119	0.000442447	0.00335	0.00136
619.048	-0.00176	0.00249	0.000449579
620.976	0.00409	0.00232	0.00154
622.905	0.01054	0.00294	0.00249
624.833	0.01244	0.00373	0.00252
626.762	0.009	0.00434	0.00262
628.69	0.00431	0.00504	0.003
630.619	0.000854305	0.0059	0.00392
632.547	-0.000484564	0.00661	0.00632
634.476	0.00174	0.00698	0.00908
636.404	0.00374	0.00695	0.00786
638.333	0.00228	0.00658	0.00306
640.261	0.000639161	0.00621	0.000405725
642.19	0.00186	0.006	0.00152
644.118	0.00337	0.00587	0.00333
646.047	0.00046919	0.00572	0.00305
647.975	-0.00506	0.00555	0.000754716
649.904	-0.00599	0.00551	-0.000411437
651.832	-0.00227	0.00554	0.000810061
653.761	0.000819324	0.00545	0.002
655.689	0.000934523	0.00547	0.00196
657.618	0.00126	0.00553	0.00185
659.546	0.00158	0.00559	0.00175
661.475	0.0019	0.00565	0.00164
663.403	0.00222	0.00571	0.00153
665.332	0.00255	0.00576	0.00142
667.26	0.00287	0.00582	0.00131
669.189	0.00319	0.00588	0.00121
671.117	0.00351	0.00594	0.0011
673.046	0.00384	0.006	0.000991847
674.974	-0.00362	0.0065	-0.000573534
676.903	-0.00337	0.00677	-0.000709546
678.831	-0.00263	0.00723	-0.000520853
680.76	-0.00139	0.00802	-0.000452215
682.688	0.000184413	0.00918	-0.000194084
684.617	0.0014	0.01043	0.000431454
686.545	0.00111	0.01143	0.00061335
688.474	0.000444553	0.01194	-0.000225156
690.402	0.00223	0.01205	-0.000511056
692.331	0.00543	0.01266	0.000693501
694.259	0.00708	0.01402	0.00174
696.188	0.00684	0.01537	0.00177
698.116	0.00687	0.01661	0.00127
700.045	0.00863	0.01814	0.000628275
701.973	0.01099	0.01991	3.29603e-05
703.902	0.01291	0.02149	-0.000822457
705.83	0.01411	0.02272	-0.00147
707.759	0.01493	0.02413	-0.00112
709.687	0.01619	0.02586	-0.000556421
711.615	0.01752	0.02723	-0.0005112
713.544	0.01876	0.02808	-0.000517645
715.472	0.01961	0.02903	-0.000469928
717.401	0.01813	0.03024	-0.00239
719.33	0.01605	0.03107	-0.00658
721.258	0.01808	0.03127	-0.00732
723.187	0.02202	0.03118	-0.00309
725.115	0.02364	0.03096	0.000436097
727.043	0.0237	0.0307	0.00152
728.972	0.02361	0.03037	0.00192
730.9	0.0235	0.02983	0.00237
732.829	0.0235	0.02922	0.00277
734.758	0.02399	0.02897	0.00317
736.686	0.02487	0.02954	0.00377
738.615	0.0259	0.03079	0.00456
740.543	0.02728	0.03229	0.00498
742.471	0.02915	0.0342	0.00468
744.4	0.032	0.037	0.00433
746.328	0.03629	0.04091	0.00437
748.257	0.04184	0.046	0.00468
750.186	0.0483	0.05222	0.00519
752.114	0.05552	0.05941	0.0057
754.043	0.06361	0.0674	0.00605
755.971	0.07283	0.07614	0.00649
757.899	0.08307	0.08576	0.00712
759.828	0.09428	0.09648	0.00779
761.756	0.10697	0.10843	0.00843
763.685	0.12154	0.12159	0.00906
765.614	0.1376	0.13586	0.00973
767.542	0.15423	0.15089	0.01071
769.471	0.17096	0.16619	0.0124
771.399	0.18752	0.18163	0.01481
773.327	0.20319	0.19647	0.01775
775.256	0.21651	0.20868	0.02121
777.184	0.22523	0.21574	0.02515
779.113	0.22696	0.21573	0.02935
781.041	0.22044	0.208	0.03363
782.97	0.20709	0.19422	0.03781
784.898	0.1914	0.17877	0.04157
786.827	0.17814	0.16642	0.04488
788.755	0.16944	0.15925	0.048
790.684	0.16526	0.15645	0.05122
792.612	0.16413	0.15623	0.05445
794.541	0.16408	0.15695	0.05729
796.469	0.16397	0.1568	0.05945
798.398	0.16306	0.15508	0.06113
800.326	0.16075	0.15263	0.06288
802.255	0.15728	0.14952	0.06457
804.183	0.1533	0.14533	0.06566
806.112	0.14931	0.14071	0.06627
808.04	0.14543	0.13637	0.06669
809.969	0.14145	0.13218	0.06681
811.897	0.13758	0.128	0.06662
813.826	0.13395	0.12427	0.06622
815.754	0.13037	0.12106	0.06539
817.683	0.12693	0.11823	0.0641
819.611	0.12398	0.11599	0.06266
821.54	0.12179	0.11434	0.06108
823.468	0.12033	0.11345	0.05927
825.397	0.11996	0.11368	0.05739
827.325	0.12093	0.11493	0.05528
829.254	0.12261	0.11679	0.05275
831.182	0.12427	0.11894	0.05013
833.111	0.12575	0.12125	0.04771
835.039	0.12683	0.12347	0.04539
836.968	0.12713	0.12472	0.04294
838.896	0.12662	0.12468	0.04031
840.825	0.12516	0.12351	0.03761
842.753	0.12263	0.12106	0.03483
844.682	0.11948	0.11756	0.03182
846.61	0.11615	0.11375	0.02858
848.539	0.11241	0.10971	0.02534
850.467	0.10797	0.10513	0.02244
852.396	0.1028	0.10013	0.01975
854.324	0.09716	0.09495	0.01696
856.253	0.09133	0.08953	0.01425
858.181	0.08505	0.08345	0.01181
860.11	0.07811	0.07659	0.0095
862.038	0.07095	0.0695	0.00733
863.967	0.06381	0.06251	0.00538
865.895	0.05694	0.0556	0.0037
867.824	0.0508	0.049	0.00253
869.752	0.0448	0.04308	0.00176
871.681	0.03845	0.03814	0.000977453
873.609	0.03292	0.03429	0.000306641
875.538	0.0288	0.03105	-8.50714e-06
877.466	0.0255	0.02781	-0.000243669
879.395	0.02262	0.02486	-0.000487532
881.323	0.02013	0.02269	-0.000555384
883.252	0.01782	0.02118	-0.000556121
885.18	0.0156	0.01985	-0.000420503
887.109	0.01377	0.01846	-0.00024437
889.037	0.01204	0.01716	-8.35344e-05
890.966	0.01022	0.01604	-0.000248522
892.894	0.00905	0.01484	-0.000340241
894.823	0.00826	0.01325	-0.000193121
896.751	0.00684	0.01159	-0.000256809
898.68	0.00547	0.01039	-0.000432773
900.608	0.00477	0.00988	-0.000191097
902.537	0.0039	0.00977	0.000158507
904.465	0.00293	0.00935	0.000233574
906.394	0.00248	0.00843	0.000343338
908.322	0.00178	0.00758	0.000441071
910.251	0.000703191	0.00695	0.000351642
912.179	0.000310995	0.00616	0.000458206
914.108	0.000284617	0.00531	0.000809145
916.036	-4.17873e-05	0.00468	0.00106
917.965	-0.000126904	0.00426	0.00136
919.893	0.000131661	0.00381	0.00182
921.822	0.000272911	0.0033	0.00196
923.75	0.000664692	0.0029	0.00191
925.679	0.00135	0.00268	0.00224
927.607	0.00163	0.00258	0.00278
929.536	0.00195	0.00234	0.00331
931.464	0.00281	0.00192	0.00418
933.393	0.00329	0.00176	0.00508
935.321	0.00329	0.0018	0.00572
937.25	0.00361	0.00156	0.00658
939.178	0.00378	0.000993287	0.00757
941.107	0.00341	0.000541949	0.00832
943.035	0.0032	0.000630781	0.00921
944.964	0.00298	0.00104	0.01037
946.892	0.00254	0.00126	0.01136
948.821	0.00282	0.00129	0.01241
950.749	0.00362	0.00129	0.01394
952.678	0.00376	0.00118	0.01534
954.606	0.00349	0.000836451	0.01643
956.535	0.00307	0.000427798	0.01777
958.463	0.00203	0.00019983	0.01911
960.392	0.00117	0.000120619	0.02016
962.32	0.00116	-3.90948e-06	0.02134
964.249	0.000810427	-0.000182203	0.02253
966.177	3.86758e-05	-0.000779727	0.02357
968.106	-2.63472e-05	-0.00115	0.02487
970.034	0.000178082	-0.00157	0.02605
971.963	0.000237702	-0.00184	0.02656
973.891	0.000388382	-0.00179	0.02714
975.82	0.000946251	-0.00152	0.02806
977.748	0.00135	-0.000920186	0.02837
979.677	0.00293	8.88691e-05	0.02841
981.605	0.00592	0.00161	0.02919
983.534	0.00935	0.00385	0.03028
985.462	0.01424	0.00696	0.03153
987.391	0.02164	0.011	0.03363
989.319	0.0311	0.01629	0.0364
991.248	0.04362	0.02341	0.03976
993.176	0.06052	0.03307	0.04461
995.105	0.08114	0.04596	0.05092
997.033	0.10581	0.06261	0.05822
998.962	0.13606	0.08342	0.06745
1000.89	0.17163	0.10875	0.07915
1002.82	0.21217	0.13922	0.09261
1004.75	0.25854	0.17554	0.1082
1006.68	0.30968	0.21784	0.12651
1008.6	0.36345	0.26544	0.14686
1010.53	0.41947	0.31704	0.16943
1012.46	0.4765	0.37116	0.19517
1014.39	0.53209	0.42649	0.22357
1016.32	0.58588	0.48188	0.25406
1018.25	0.63744	0.53625	0.28691
1020.17	0.68476	0.5886	0.32128
1022.1	0.72833	0.63801	0.35623
1024.03	0.76985	0.68417	0.39238
1025.96	0.8082	0.72779	0.4294
1027.89	0.84295	0.76954	0.46588
1029.82	0.87574	0.80921	0.5021
1031.75	0.90592	0.84652	0.53844
1033.67	0.93207	0.88121	0.57388
1035.6	0.95488	0.91278	0.60839
1037.53	0.97371	0.94076	0.64255
1039.46	0.987	0.96442	0.67566
1041.39	0.99573	0.98253	0.70769
1043.32	1	0.99432	0.73936
1045.25	0.99804	1	0.76966
1047.17	0.99119	0.99969	0.79795
1049.1	0.98149	0.99317	0.82542
1051.03	0.968	0.9811	0.85177
1052.96	0.95137	0.96486	0.87588
1054.89	0.93373	0.94516	0.89875
1056.82	0.91446	0.92234	0.92048
1058.74	0.89388	0.89748	0.93937
1060.67	0.8746	0.87173	0.95584
1062.6	0.85611	0.84581	0.97063
1064.53	0.83715	0.82021	0.98225
1066.46	0.81991	0.79531	0.9907
1068.39	0.80469	0.77166	0.99708
1070.32	0.78929	0.74977	1
1072.24	0.7745	0.72971	0.99886
1074.17	0.76132	0.71126	0.99529
1076.1	0.74806	0.69411	0.9887
1078.03	0.73516	0.6779	0.97779
1079.96	0.7238	0.66243	0.96365
1081.89	0.71192	0.64787	0.94625
1083.82	0.69906	0.63446	0.92434
1085.74	0.68737	0.62195	0.89893
1087.67	0.67599	0.60982	0.87063
1089.6	0.6639	0.59806	0.83817
1091.53	0.65307	0.58703	0.8023
1093.46	0.64318	0.57682	0.7644
1095.39	0.63262	0.56729	0.72363
1097.32	0.62314	0.55837	0.68065
1099.24	0.61522	0.55007	0.63775
1101.17	0.60679	0.54243	0.59464
1103.1	0.59882	0.53561	0.55123
1105.03	0.59278	0.52981	0.50996
1106.96	0.58689	0.52499	0.47153
1108.89	0.58136	0.52083	0.43539
1110.81	0.578	0.517	0.4032
1112.74	0.575	0.51378	0.37571
1114.67	0.57167	0.51174	0.35165
1116.6	0.57028	0.51072	0.33139
1118.53	0.56971	0.51001	0.31531
1120.46	0.56822	0.50936	0.30169
1122.38	0.56753	0.50904	0.29016
1124.31	0.56757	0.50914	0.28132
1126.24	0.5664	0.50927	0.27384
1128.17	0.56518	0.50917	0.267
1130.1	0.56455	0.50877	0.26172
1132.03	0.56257	0.50795	0.25736
1133.96	0.55985	0.50652	0.25298
1135.88	0.55767	0.50454	0.24956
1137.81	0.55422	0.50207	0.24696
1139.74	0.54924	0.49887	0.24393
1141.67	0.54447	0.49486	0.24104
1143.6	0.53896	0.49046	0.23876
1145.53	0.53202	0.48596	0.23605
1147.46	0.52544	0.48098	0.23333
1149.38	0.51864	0.47502	0.23143
1151.31	0.51016	0.46816	0.22929
1153.24	0.50153	0.46083	0.22683
1155.17	0.49317	0.45304	0.22511
1157.1	0.48356	0.44477	0.22332
1159.03	0.47367	0.4364	0.22097
1160.95	0.46439	0.4281	0.21921
1162.88	0.45433	0.41957	0.2176
1164.81	0.44394	0.41065	0.21523
1166.74	0.4345	0.40153	0.21313
1168.67	0.42464	0.39237	0.21152
1170.6	0.41404	0.38326	0.20939
1172.53	0.40419	0.37435	0.20732
1174.45	0.39438	0.36562	0.20577
1176.38	0.38412	0.35705	0.20363
1178.31	0.37494	0.34856	0.20124
1180.24	0.36625	0.3401	0.19951
1182.17	0.35669	0.33202	0.1976
1184.1	0.34756	0.32444	0.19537
1186.03	0.33912	0.31692	0.19369
1187.95	0.33007	0.30931	0.192
1189.88	0.32127	0.30163	0.18981
1191.81	0.31331	0.29388	0.18795
1193.74	0.30466	0.28634	0.18634
1195.67	0.29563	0.2792	0.18436
1197.6	0.2874	0.27199	0.18252
1199.53	0.27882	0.26435	0.18092
1201.45	0.26973	0.25659	0.1789
1203.38	0.26135	0.24887	0.17689
1205.31	0.25291	0.24111	0.17522
1207.24	0.24368	0.23337	0.17306
1209.17	0.23461	0.22564	0.17054
1211.1	0.22554	0.2176	0.1685
1213.03	0.21583	0.20906	0.16651
1214.95	0.20637	0.2002	0.16409
1216.88	0.19728	0.19119	0.16174
1218.81	0.18754	0.18214	0.15926
1220.74	0.17771	0.17306	0.15636
1222.67	0.16843	0.16398	0.15372
1224.6	0.15866	0.15497	0.15126
1226.52	0.14866	0.14624	0.14815
1228.45	0.13992	0.13776	0.1449
1230.38	0.13163	0.1293	0.14199
1232.31	0.12294	0.12101	0.13865
1234.24	0.1151	0.11322	0.13491
1236.17	0.10815	0.10593	0.13137
1238.1	0.10108	0.09918	0.12751
1240.02	0.09475	0.09305	0.12323
1241.95	0.08969	0.08739	0.11929
1243.88	0.08459	0.08208	0.11523
1245.81	0.07954	0.07709	0.11037
1247.74	0.0754	0.07249	0.10545
1249.67	0.07116	0.06845	0.10056
1251.6	0.06695	0.06487	0.09487
1253.52	0.0643	0.06157	0.08903
1255.45	0.06205	0.05879	0.08356
1257.38	0.05959	0.05687	0.07755
1259.31	0.05955	0.0562	0.07149
1261.24	0.06227	0.05774	0.06644
1263.17	0.06754	0.06302	0.06132
1265.09	0.0799	0.07449	0.05603
1267.02	0.10364	0.09596	0.05202
1268.95	0.14093	0.13103	0.04843
1270.88	0.19393	0.17941	0.04428
1272.81	0.25361	0.2311	0.04086
1274.74	0.2954	0.26538	0.03804
1276.66	0.29838	0.26346	0.03485
1278.59	0.26223	0.22616	0.03241
1280.52	0.20615	0.1747	0.03081
1282.45	0.15393	0.13001	0.02855
1284.38	0.11765	0.09892	0.02648
1286.31	0.09434	0.079	0.0254
1288.24	0.07805	0.06631	0.02366
1290.16	0.0675	0.05797	0.02159
1292.09	0.06071	0.052	0.02065
1294.02	0.05476	0.04718	0.01961
1295.95	0.05023	0.04312	0.01805
1297.88	0.04717	0.03981	0.01725
1299.81	0.04348	0.03701	0.01642
1301.74	0.04002	0.03441	0.01492
1303.66	0.03804	0.03208	0.01411
1305.59	0.03566	0.03013	0.01356
1307.52	0.03286	0.02825	0.01216
1309.45	0.0315	0.02617	0.01138
1311.38	0.0299	0.02418	0.01135
1313.31	0.02692	0.0226	0.01016
1315.23	0.025	0.02125	0.00885
1317.16	0.02379	0.01979	0.00873
1319.09	0.02165	0.01828	0.00808
1321.02	0.02036	0.01688	0.00688
1322.95	0.01975	0.01559	0.00666
1324.88	0.01773	0.01443	0.00623
1326.81	0.01611	0.01335	0.00519
1328.73	0.0156	0.01235	0.00511
1330.66	0.01358	0.01135	0.00517
1332.59	0.01129	0.01037	0.00418
1334.52	0.01115	0.0096	0.00342
1336.45	0.01149	0.00894	0.00326
1338.38	0.01168	0.00782	0.00319
1340.31	0.01185	0.00602	0.00346
1342.23	0.00924	0.00459	0.00311
1344.16	0.00582	0.00384	0.00166
1346.09	0.00514	0.00321	0.000673191
1348.02	0.00562	0.00304	0.0012
1349.95	0.00443	0.00265	0.00135
1351.88	0.00433	0.00236	0.000786142
1353.81	0.00516	0.0024	0.000901804
1355.73	0.00441	0.00256	0.00111
1357.66	0.00434	0.0027	0.000737477
1359.59	0.00483	0.00281	0.000346074
1361.52	0.0013	0.00234	-0.00101
1363.45	-0.00179	0.00146	-0.00263
1365.38	0.000632505	0.00129	-0.00176
1367.31	0.00199	0.0015	-0.000207584
1369.23	0.00162	0.0015	0.000107135
1371.16	0.00422	0.00163	0.000853954
1373.09	0.00614	0.00163	0.00225
1375.02	0.00324	0.00111	0.00149
1376.95	0.00183	0.001	9.46236e-05
1378.88	0.00289	0.00147	0.000414
1380.8	0.00233	0.00174	0.000445473
1382.73	0.0021	0.00166	-5.86882e-05
1384.66	0.00246	0.00136	0.000312879
1386.59	8.43898e-05	0.000757118	-6.81246e-05
1388.52	-0.000868182	0.000497702	-0.00145
1390.45	0.00174	0.00113	-0.00125
1392.38	0.00241	0.00217	-0.000883214
1394.3	0.00281	0.00328	-0.0012
1396.23	0.00658	0.00396	0.00073262
1398.16	0.00756	0.00388	0.00319
1400.09	0.00572	0.00402	0.00217
1402.02	0.00779	0.00524	0.00127
1403.95	0.01127	0.00682	0.00293
1405.88	0.01136	0.00796	0.00277
1407.8	0.01123	0.00899	0.000530609
1409.73	0.01195	0.01002	0.000104918
1411.66	0.01095	0.01063	0.000169459
1413.59	0.01096	0.01097	-0.000437927
1415.52	0.01267	0.01147	-2.77701e-05
1417.45	0.01179	0.01154	-0.000402735
1419.37	0.01019	0.01002	-0.0022
1421.3	0.01089	0.00801	-0.00021119
1423.23	0.0088	0.00653	0.00238
1425.16	0.00577	0.00544	0.00156
1427.09	0.00624	0.00499	0.00113
1429.02	0.00658	0.00481	0.00297
1430.94	0.00459	0.00456	0.00296
1432.87	0.00397	0.00421	0.00174
1434.8	0.0021	0.00294	0.00191
1436.73	-0.00253	0.000924047	0.000697078
1438.66	-0.00158	0.000761276	-0.000825096
1440.59	0.00157	0.00176	0.000147781
1442.52	0.00166	0.0024	0.00097751
1444.44	0.00261	0.00299	0.00112
1446.37	0.00609	0.0038	0.0029
1448.3	0.00608	0.0039	0.00439
1450.23	0.00292	0.00305	0.00287
1452.16	0.00209	0.00255	0.00174
1454.09	0.00218	0.00323	0.00229
1456.02	0.00229	0.0041	0.00195
1457.94	0.00341	0.00281	0.000590185
1459.87	0.00203	0.00191	0.000756204
1461.8	-0.00051807	0.00203	0.000182668
1463.73	-0.00159	0.00151	-0.00133
1465.66	-0.000515706	0.00107	-0.000745955
1467.59	0.000643686	0.00186	0.000635955
1469.52	0.00266	0.00299	0.000439366
1471.44	0.00566	0.00343	0.00182
1473.37	0.00496	0.00258	0.006
1475.3	0.00393	0.00189	0.00707
1477.23	0.00496	0.00189	0.00561
1479.16	0.00419	0.00202	0.00378
1481.09	0.00325	0.00202	0.00209
1483.02	0.00365	0.00191	0.00164
1484.94	0.00275	0.00205	0.00154
1486.87	0.000711475	0.00231	-0.000220294
1488.8	0.00214	0.00221	-0.00135
1490.73	0.00447	0.00202	0.00124
1492.66	0.00249	0.00201	0.00183
1494.59	0.000186215	0.00154	-0.000930413
1496.51	-0.00155	0.000403535	-0.00286
1498.44	-0.00343	-0.000199769	-0.00175
1500.37	-0.00187	0.00030404	-0.00024477
1502.3	0.000855627	0.00112	0.000775814
1504.23	0.00118	0.00193	0.00112
1506.16	0.00246	0.00205	0.00159
1508.09	0.0079	0.00158	0.00466
1510.01	0.00805	0.00239	0.00565
1511.94	0.00659	0.00289	0.00378
1513.87	0.00594	0.00249	0.00242
1515.8	0.00193	0.00126	0.00223
1517.73	-0.00428	-0.000237784	1.11242e-05
1519.66	-0.00258	-0.000512757	-0.00135
1521.58	0.00423	0.000925188	0.00421
1523.51	0.00632	0.00283	0.00908
1525.44	0.00742	0.00328	0.00811
1527.37	0.00775	0.00257	0.00694
1529.3	0.00522	0.00206	0.0062
1531.23	0.0044	0.00167	0.00374
1533.15	0.00608	0.000881567	0.00197
1535.08	0.00381	0.000620097	0.00287
1537.01	-0.00057906	0.000754043	0.00224
1538.94	-0.00134	-0.000317194	-0.000221265
1540.87	-0.00125	-0.00231	-0.000531614
1542.8	-0.00302	-0.00249	-0.00074997
1544.73	-0.000598545	-0.0018	-0.000334412
1546.65	0.00214	-0.000322708	0.00251
1548.58	0.00345	0.00136	0.00506
1550.51	0.00399	0.00183	0.00536
1552.44	0.0014	0.000950709	0.00382
1554.37	-0.00386	-0.000257807	0.000888174
1556.3	-0.0056	-0.00107	-0.00231
1558.23	-0.00288	-0.00188	-0.000660812
1560.15	-0.00267	-0.00188	0.0029
1562.08	0.000305975	-0.000378773	0.00225
1564.01	0.00435	0.000969399	0.00286
1565.94	0.00379	0.00161	0.00427
1567.87	8.58991e-05	0.00133	0.00364
1569.8	-0.000368253	0.00029521	0.00204
1571.72	0.000745218	9.85852e-05	0.00201
1573.65	-0.000141857	0.000290927	0.00132
1575.58	0.000264799	-0.000485922	-0.000285193
1577.51	0.00242	-0.000655594	0.000963259
1579.44	0.00276	0.000313542	0.00257
1581.37	0.00355	0.000977061	0.00271
1583.3	0.00448	0.00138	0.00307
1585.22	0.00386	0.0017	0.00334
1587.15	0.00397	0.00183	0.00309
1589.08	0.00493	0.00188	0.00341
1591.01	0.0041	0.00196	0.00369
1592.94	0.00341	0.0019	0.00316
1594.87	0.00461	0.00183	0.00331
1596.8	0.00476	0.00197	0.00406
1598.72	0.00409	0.00205	0.00384
1600.65	0.00485	0.00188	0.00377
1602.58	0.00522	0.00178	0.00467
1604.51	0.00464	0.00194	0.00486
1606.44	0.00519	0.00224	0.00475
1608.37	0.00564	0.00251	0.00582
1610.3	0.00519	0.00266	0.00667
1612.22	0.0059	0.00285	0.00653
1614.15	0.00669	0.00274	0.00618
1616.08	0.00627	0.00157	0.00565
1618.01	0.00738	0.000896278	0.00633
1619.94	0.00922	0.00179	0.00824
1621.87	0.00963	0.0026	0.00968
1623.8	0.00957	0.00272	0.01054
1625.72	0.00911	0.00271	0.01179
1627.65	0.00741	0.00247	0.01263
1629.58	0.00663	0.00207	0.01179
1631.51	0.00769	0.00207	0.01056
1633.44	0.00803	0.00196	0.00951
1635.37	0.00677	0.00109	0.00832
1637.29	0.00712	0.000732059	0.00922
1639.22	0.00787	0.00134	0.01121
1641.15	0.00771	0.00197	0.012
1643.08	0.00847	0.00265	0.01228
1645.01	0.00995	0.00303	0.01319
1646.94	0.00953	0.00186	0.01291
1648.87	0.0089	0.00118	0.01158
1650.79	0.00888	0.00197	0.01214
1652.72	0.00743	0.00119	0.01212
1654.65	0.00775	-0.000385849	0.00977
1656.58	0.00881	0.000312403	0.00936
1658.51	0.00776	0.00123	0.00952
1660.44	0.00613	0.00148	0.00838
1662.37	0.00637	0.00088495	0.00676
1664.29	0.00677	0.000669196	0.00703
1666.22	0.00567	0.00113	0.00714
1668.15	0.00555	0.000780808	0.00569
1670.08	0.00582	-0.000310823	0.00533
1672.01	0.00451	-0.000469296	0.00554
1673.94	0.00514	-0.00052255	0.00424
1675.86	0.00707	-0.000377994	0.00459
1677.79	0.00648	0.001	0.00688
1679.72	0.00555	0.00261	0.00812
1681.65	0.00636	0.00332	0.0081
1683.58	0.00725	0.0019	0.00667
1685.51	0.00814	7.63657e-06	0.00495
1687.43	0.0089	0.000482151	0.00521
1689.36	0.00749	0.00123	0.00566
1691.29	0.00582	0.00169	0.00548
1693.22	0.00592	0.00243	0.0059
1695.15	0.00561	0.0027	0.00693
1697.08	0.00438	0.00126	0.00524
1699.01	0.00723	-0.000621632	0.00207
1700.93	0.01041	-0.000640519	0.00335
1702.86	0.00905	0.000479903	0.00521
1704.79	0.00841	0.000326222	0.00429
1706.72	0.00885	-0.000554509	0.00335
1708.65	0.00769	-0.000424973	0.00362
1710.58	0.00677	0.00021789	0.00359
1712.51	0.00677	0.000827947	0.00348
1714.43	0.00512	0.00127	0.00365
1716.36	0.00302	0.000428443	0.00261
1718.29	0.00524	-0.00149	0.00126
1720.22	0.00659	-0.00168	0.00181
1722.15	0.00603	-0.00104	0.00226
1724.08	0.00641	-0.000936974	0.00197
1726.01	0.00659	-0.000894173	0.00188
1727.93	0.00522	-0.000319641	0.0019
1729.86	0.00446	0.000196911	0.00147
1731.79	0.00556	-0.000327287	0.00090541
1733.72	0.00711	-0.00222	0.000509711
1735.65	0.00802	-0.00297	0.000422163
1737.58	0.00769	-0.00219	0.000342851
1739.51	0.00634	-0.00182	-0.000225046
1741.43	0.00631	-0.00195	-0.000761134
1743.36	0.00785	-0.00186	-0.000177061
1745.29	0.00789	-0.00155	0.000925099
1747.22	0.00646	-0.00124	0.00118
1749.15	0.00573	-0.0011	0.00125
1751.08	0.00498	-0.00135	0.00164
1753	0.00443	-0.00175	0.00116
1754.93	0.00538	-0.0019	0.000774313
1756.86	0.00594	-0.00202	0.000974255
1758.79	0.00497	-0.00226	0.000320796
1760.72	0.005	-0.00274	-0.000963708
1762.65	0.00555	-0.00319	-0.00096069
1764.58	0.00468	-0.0029	-0.000403293
1766.5	0.00449	-0.00244	-0.00080048
1768.43	0.00562	-0.00233	-0.00111
1770.36	0.00533	-0.00218	-0.000150229
1772.29	0.00364	-0.00212	0.000895697
1774.22	0.00328	-0.00224	0.000948277
1776.15	0.00295	-0.00229	0.000637821
1778.08	0.0027	-0.00246	-5.76251e-06
1780	0.00373	-0.00266	-0.000565701
1781.93	0.00388	-0.00248	-0.00036991
1783.86	0.00256	-0.00219	-0.000141829
1785.79	0.00229	-0.0023	-0.000367062
1787.72	0.00249	-0.00227	-0.000372937
1789.65	0.00181	-0.00199	-0.000427034
1791.57	0.00186	-0.00227	-0.00131
1793.5	0.00269	-0.00277	-0.00173
1795.43	0.00212	-0.00257	-0.0012
1797.36	0.00191	-0.00232	-0.00090784
1799.29	0.00279	-0.00241	-0.00073981
1801.22	0.00247	-0.00258	-0.000762952
1803.14	0.0015	-0.00264	-0.00122
1805.07	0.00159	-0.00255	-0.00137
1807	0.00139	-0.0022	-0.0011
1808.93	0.000636481	-0.00173	-0.00113
1810.86	0.000907437	-0.00164	-0.00126
1812.79	0.00117	-0.00191	-0.000929092
1814.72	0.000603834	-0.00213	-0.00083784
1816.64	0.00081629	-0.00226	-0.00108
1818.57	0.00123	-0.00226	-0.000932567
1820.5	0.00060784	-0.00199	-0.000601361
1822.43	0.000447974	-0.00157	-0.000387375
1824.36	0.00109	-0.00134	6.8621e-05
1826.29	0.00095001	-0.00133	8.54605e-05
1828.22	0.0012	-0.00153	-0.000787262
1830.14	0.00229	-0.00195	-0.00116
1832.07	0.0018	-0.00185	-0.000722238
1834	0.00104	-0.00139	-0.000523901
1835.93	0.00169	-0.00135	-0.000366629
1837.86	0.00176	-0.00156	-6.10231e-05
1839.79	0.000809016	-0.00136	-0.000107964
1841.71	0.000734904	-0.000745745	-0.000244475
1843.64	0.000665998	-0.000549862	-8.51775e-06
1845.57	-0.000192349	-0.001	9.6064e-06
1847.5	0.000272246	-0.00128	-0.000201154
1849.43	0.00104	-0.0013	4.02376e-05
1851.36	0.000564784	-0.00125	0.000339334
1853.29	0.000362747	-0.00121	0.000315185
1855.21	0.000850825	-0.00122	0.000469892
1857.14	0.000537272	-0.00116	0.000707944
1859.07	0.000291633	-0.00115	0.000491262
1861	0.000874829	-0.00134	0.000287889
1862.93	0.000713255	-0.00136	0.000445891
1864.86	0.000175056	-0.000954497	0.000521987
1866.79	0.000704158	-0.000580999	0.000506784
1868.71	0.000802489	-0.000704054	0.000523659
1870.64	-4.61708e-05	-0.000880559	0.000341891
1872.57	0.00018474	-0.000783757	0.000252045
1874.5	0.000465071	-0.000679031	0.000429781
1876.43	-0.000158462	-0.000659296	0.000427605
1878.36	-0.000133227	-0.000702203	0.000176044
1880.29	0.000285901	-0.000779456	0.000249135
1882.21	-0.000273755	-0.000801562	0.000458421
1884.14	-0.000412049	-0.000788451	0.000323767
1886.07	0.000363999	-0.000708617	0.000380465
1888	0.000347912	-0.000606747	0.000789989
1889.93	0.000126671	-0.000687183	0.000708493
1891.86	0.000653355	-0.000802706	0.000330162
1893.78	0.000313214	-0.000865527	0.000260925
1895.71	-0.000521293	-0.000965794	3.05527e-05
1897.64	-0.000224514	-0.00104	-0.000313991
1899.57	-0.000158928	-0.0011	-0.000284496
1901.5	-0.000864339	-0.00107	-0.000315172
1903.43	-0.000707152	-0.000942915	-0.000576962
1905.36	-0.000363569	-0.000824451	-0.000521166
1907.28	-0.000839597	-0.000814928	-0.000381844
1909.21	-0.000666743	-0.000991442	-0.000581093
1911.14	-0.000146241	-0.00121	-0.000636803
1913.07	-0.000805448	-0.00121	-0.000568602
1915	-0.00133	-0.00101	-0.000735527
1916.93	-0.000972851	-0.000833731	-0.000742204
1918.86	-0.00118	-0.000643864	-0.000562254
1920.78	-0.00129	-0.0003705	-0.000658709
1922.71	-0.00049383	-0.000464702	-0.000723945
1924.64	-0.00066849	-0.000897459	-0.000634348
1926.57	-0.00148	-0.00114	-0.000832243
1928.5	-0.00117	-0.00118	-0.00105
1930.43	-0.000840508	-0.00116	-0.000890336
1932.35	-0.00127	-0.00113	-0.000861766
1934.28	-0.00103	-0.00106	-0.0011
1936.21	-0.000689063	-0.000912655	-0.00102
1938.14	-0.00131	-0.000598636	-0.00080331
1940.07	-0.00134	-0.00024874	-0.000782026
1942	-0.000764032	-0.000273685	-0.000627193
1943.92	-0.00127	-0.000513408	-0.000477307
1945.85	-0.00144	-0.000475343	-0.000626417
1947.78	-0.000645552	-0.000296138	-0.000674723
1949.71	-0.00086488	-0.000224074	-0.000532884
1951.64	-0.00148	-0.000284622	-0.000576613
1953.57	-0.00105	-0.000374492	-0.000692379
1955.5	-0.00105	-0.000297086	-0.000624531
1957.42	-0.00155	-8.13412e-05	-0.000620751
1959.35	-0.000920716	2.16914e-05	-0.000650878
1961.28	-0.000475376	9.73735e-05	-0.000435413
1963.21	-0.00103	0.000349999	-0.000271006
1965.14	-0.000759624	0.000533823	-0.00032199
1967.07	-0.000154174	0.000456258	-0.000252728
1969	-0.00070906	0.000445784	-0.000173142
1970.92	-0.000893497	0.00055712	-0.00030716
1972.85	-0.000439393	0.000489174	-0.000344891
1974.78	-0.000801497	0.00034636	-0.000213311
1976.71	-0.000954559	0.000369656	-0.000157094
1978.64	-0.000315438	0.000524036	-3.36372e-05
1980.57	-0.000580119	0.000762245	0.000214099
1982.49	-0.00109	0.000934274	0.000214302
1984.42	-0.000539296	0.000843491	7.23529e-05
1986.35	-0.000531665	0.000735696	0.000149162
1988.28	-0.0013	0.000856544	0.000223565
1990.21	-0.000978902	0.000892227	0.000193845
1992.14	-0.000466885	0.000681775	0.000278941
1994.07	-0.000991375	0.000601854	0.000278095
1995.99	-0.0011	0.000639507	0.00012009
1997.92	-0.000935856	0.000615493	0.000149763
1999.85	-0.00158	0.000723239	0.000329422
2001.78	-0.00169	0.000888448	0.000343031
2003.71	-0.001	0.000866741	0.000280132
2005.64	-0.00119	0.000800337	0.000300018
2007.57	-0.00163	0.000763782	0.000336074
2009.49	-0.00134	0.000582612	0.000438359
2011.42	-0.00151	0.000436512	0.000555868
2013.35	-0.00187	0.000493037	0.000477419
2015.28	-0.00135	0.000395262	0.000360934
2017.21	-0.00123	0.000136224	0.000448779
2019.14	-0.00176	0.000217849	0.000557546
2021.07	-0.00144	0.000457096	0.00051572
2022.99	-0.00117	0.000361499	0.000415242
2024.92	-0.00189	0.000151525	0.000260009
2026.85	-0.00215	7.34114e-05	0.000106743
2028.78	-0.00192	-6.71828e-05	0.000122849
2030.71	-0.0024	-0.000219001	0.000125033
2032.64	-0.00264	-0.000221599	-9.92967e-05
2034.57	-0.00219	-0.000105668	-0.000273787
2036.49	-0.00224	0.000135571	-0.000184319
2038.42	-0.00229	0.000314641	-6.81236e-05
2040.35	-0.0017	0.000124465	-0.000107782
2042.28	-0.00188	-0.000204996	-0.000229589
2044.21	-0.00265	-0.000327081	-0.000420577
2046.14	-0.00256	-0.000434921	-0.000602274
2048.06	-0.00238	-0.000504776	-0.000538649
2049.99	-0.00272	-0.000347904	-0.000342204
2051.92	-0.00263	-0.000332766	-0.000369779
2053.85	-0.0025	-0.000590677	-0.000534786
2055.78	-0.00284	-0.000684996	-0.000605882
2057.71	-0.00247	-0.000646196	-0.000693793
2059.64	-0.0018	-0.000701533	-0.000778043
2061.56	-0.00228	-0.000606129	-0.000727705
2063.49	-0.00276	-0.000445502	-0.00077371
2065.42	-0.00229	-0.000576975	-0.000967077
2067.35	-0.00221	-0.00077301	-0.00102
2069.28	-0.00243	-0.000861142	-0.00101
2071.21	-0.00208	-0.00103	-0.00107
2073.14	-0.00215	-0.00104	-0.000977314
2075.06	-0.00266	-0.000746355	-0.000729204
2076.99	-0.00243	-0.000588899	-0.000641586
2078.92	-0.00224	-0.000639591	-0.000691286
2080.85	-0.00275	-0.000707204	-0.000733732
2082.78	-0.00263	-0.000869066	-0.000825336
2084.71	-0.00207	-0.000927245	-0.000831235
2086.63	-0.00215	-0.000576414	-0.000656886
2088.56	-0.00206	-0.000272244	-0.000624089
2090.49	-0.00164	-0.000472306	-0.000766553
2092.42	-0.002	-0.000775027	-0.000732329
2094.35	-0.00238	-0.000852684	-0.000666553
2096.28	-0.00206	-0.000860028	-0.00080749
2098.2	-0.00212	-0.000792967	-0.000844857
2100.13	-0.00228	-0.000656672	-0.000746667
2102.06	-0.00153	-0.000652279	-0.000870785
2103.99	-0.00116	-0.000688065	-0.00103
2105.92	-0.00168	-0.000614752	-0.000968617
2107.85	-0.00166	-0.000566265	-0.000961565
2109.78	-0.0014	-0.000483837	-0.000983277
2111.7	-0.00153	-0.000281759	-0.00082826
2113.63	-0.00114	-0.000198491	-0.000736882
2115.56	-0.000650174	-0.00018957	-0.000754653
2117.49	-0.00108	5.1441e-05	-0.000665255
2119.42	-0.00118	0.000341339	-0.000641016
2121.35	-0.000509181	0.000334398	-0.000665831
2123.28	-0.000546089	0.000236654	-0.000444623
2125.2	-0.00087006	0.00026316	-0.000294532
2127.13	-0.000536442	0.00030692	-0.000466906
2129.06	-0.000500079	0.000464852	-0.000513312
2130.99	-0.000644562	0.00067288	-0.000382774
2132.92	-0.000175049	0.000651898	-0.0003542
2134.85	-0.000105536	0.000617837	-0.00018743
2136.78	-0.000574977	0.000767443	0.00012878
2138.7	-0.000335094	0.000800515	0.000166504
2140.63	2.82143e-05	0.000738638	5.0976e-05
2142.56	-0.000327505	0.000784237	0.000132244
2144.49	-0.000448335	0.000763228	0.000163801
2146.42	-0.000272975	0.000751707	5.40463e-05
2148.35	-0.000571226	0.000956506	0.000137421
2150.28	-0.000581892	0.00115	0.000304827
2152.2	-0.000131452	0.00121	0.000346653
2154.13	-0.000290593	0.00136	0.000464311
2156.06	-0.000495653	0.00155	0.000638144
2157.99	-2.69316e-05	0.00144	0.000702142
2159.92	3.76002e-05	0.00114	0.000812641
2161.85	-0.000356404	0.00101	0.000920505
2163.77	-0.000239835	0.000983538	0.000858234
2165.7	-0.000211038	0.00102	0.000923688
2167.63	-0.000552735	0.00122	0.00118
2169.56	-0.000321299	0.00153	0.00126
2171.49	6.12023e-05	0.00183	0.00124
2173.42	-8.95178e-05	0.00199	0.00137
2175.34	8.21563e-05	0.00189	0.00144
2177.27	0.000551583	0.00177	0.00146
2179.2	0.000339658	0.0019	0.00158
2181.13	7.91202e-05	0.00203	0.0017
2183.06	0.000303017	0.00191	0.00185
2184.99	0.000208125	0.00181	0.00212
2186.92	0.000103906	0.00191	0.00227
2188.84	0.00058134	0.00204	0.00227
2190.77	0.000768457	0.00212	0.00239
2192.7	0.0005794	0.00214	0.00254
2194.63	0.000792834	0.00211	0.0026
2196.56	0.000886376	0.00218	0.00278
2198.49	0.000648962	0.00248	0.00302
2200.42	0.000903807	0.00266	0.00307
2202.34	0.00116	0.00251	0.00313
2204.27	0.000825914	0.00236	0.00333
2206.2	0.000835664	0.00243	0.00343
2208.13	0.00113	0.00255	0.00339
2210.06	0.000845444	0.00254	0.00339
2211.99	0.000624541	0.00242	0.00336
2213.91	0.000867058	0.00228	0.0033
2215.84	0.000766825	0.00211	0.00332
2217.77	0.000525479	0.00201	0.0034
2219.7	0.000686831	0.00209	0.00351
2221.63	0.000591614	0.00227	0.00369
2223.56	0.000273131	0.00228	0.00379
2225.49	0.000504944	0.00201	0.00373
2227.41	0.000772836	0.00171	0.0038
2229.34	0.000596688	0.0017	0.00397
2231.27	0.000653305	0.00179	0.0039
2233.2	0.000816422	0.00169	0.00376
2235.13	0.000528028	0.00162	0.00384
2237.06	0.000463718	0.00165	0.00398
2238.99	0.000781851	0.00162	0.004
2240.91	0.000699392	0.00163	0.00398
2242.84	0.000550776	0.00167	0.00395
2244.77	0.000691833	0.00143	0.00398
2246.7	0.000389601	0.00113	0.00405
2248.63	-7.35627e-05	0.00112	0.00402
2250.56	0.000110333	0.00125	0.00389
2252.49	0.000215732	0.0014	0.00382
2254.41	-8.62025e-05	0.00151	0.00385
2256.34	1.51664e-05	0.00138	0.00391
2258.27	7.71653e-05	0.00111	0.00402
2260.2	-0.000389511	0.000952531	0.00409
2262.13	-0.000441953	0.000791717	0.00407
2264.06	-0.000291915	0.000586048	0.00404
2265.98	-0.000797187	0.000588403	0.00408
2267.91	-0.000955185	0.000723844	0.00414
2269.84	-0.000357546	0.000786661	0.00416
2271.77	-0.000195705	0.00085901	0.00413
2273.7	-0.000236397	0.000905102	0.00406
2275.63	0.000142762	0.000753218	0.00401
2277.55	0.00013228	0.000497207	0.004
2279.48	-9.79224e-05	0.000337208	0.00396
2281.41	0.000204474	0.000324935	0.00388
2283.34	0.000180694	0.000493326	0.00383
2285.27	-0.000389483	0.000728446	0.00382
2287.2	-0.000405169	0.000687509	0.00379
2289.13	-0.000266329	0.000388418	0.00374
2291.05	-0.000260034	0.000373408	0.00372
2292.98	-0.000248528	0.000345978	0.00367
2294.91	-0.000237017	0.000318533	0.00362
2296.84	-0.000225512	0.000291103	0.00357
2298.77	-0.000214	0.000263659	0.00352
2300.7	-0.000202489	0.000236214	0.00347
2302.63	-0.000190984	0.000208784	0.00342
2304.55	-0.000179478	0.000181354	0.00337
2306.48	-0.000167967	0.00015391	0.00333
2308.41	-0.000156462	0.000126479	0.00328
2310.34	-0.000144951	9.90349e-05	0.00323
2312.27	-0.000133445	7.16047e-05	0.00318
2314.2	-0.000121934	4.41603e-05	0.00313
2316.12	-0.000110429	1.673e-05	0.00308
2318.05	-9.89173e-05	-1.07144e-05	0.00303
2319.98	-8.7412e-05	-3.81446e-05	0.00298
2321.91	-7.59007e-05	-6.5589e-05	0.00293
2323.84	-6.43953e-05	-9.30192e-05	0.00288
2325.77	-5.2884e-05	-0.000120464	0.00284
2327.7	-4.13787e-05	-0.000147894	0.00279
2329.62	-2.98674e-05	-0.000175338	0.00274
2331.55	-1.83621e-05	-0.000202768	0.00269
2333.48	-6.85077e-06	-0.000230213	0.00264
2335.41	4.65456e-06	-0.000257643	0.00259
2337.34	1.61659e-05	-0.000285088	0.00254
2339.27	2.76712e-05	-0.000312518	0.00249
2341.2	3.91825e-05	-0.000339962	0.00244
2343.12	5.06878e-05	-0.000367392	0.0024
2345.05	6.21991e-05	-0.000394837	0.00235
2346.98	7.37045e-05	-0.000422267	0.0023
2348.91	8.52158e-05	-0.000449711	0.00225
2350.84	9.67211e-05	-0.000477142	0.0022
2352.77	0.000108232	-0.000504586	0.00215
2354.7	0.000119738	-0.000532016	0.0021
2356.62	0.000131249	-0.000559461	0.00205
2358.55	0.000142754	-0.000586891	0.002
2360.48	0.000154266	-0.000614335	0.00196
2362.41	0.000165771	-0.000641766	0.00191
2364.34	0.000177282	-0.00066921	0.00186
2366.27	0.000188788	-0.00069664	0.00181
2368.2	0.000200299	-0.000724085	0.00176
2370.12	0.000211804	-0.000751515	0.00171
2372.05	0.000223316	-0.000778959	0.00166
2373.98	0.000234821	-0.000806389	0.00161
2375.91	0.000246332	-0.000833834	0.00156
2377.84	0.000257838	-0.000861264	0.00152
2379.77	0.000269349	-0.000888709	0.00147
2381.69	0.000280854	-0.000916139	0.00142
2383.62	0.000292365	-0.000943583	0.00137
2385.55	0.000303871	-0.000971013	0.00132
2387.48	0.000315382	-0.000998458	0.00127
2389.41	0.000326887	-0.00103	0.00122
2391.34	0.000338399	-0.00105	0.00117
2393.26	0.000349904	-0.00108	0.00112
2395.19	0.000255958	-0.00127	0.000922796
2397.12	0.000179274	-0.00127	0.000808281
2399.05	0.000689721	-0.00133	0.000794283
2400.98	0.000681408	-0.00143	0.000763954
2402.91	0.000206811	-0.00128	0.000798173
2404.84	0.000334448	-0.00106	0.000910147
2406.76	0.000384812	-0.00106	0.000849727
2408.69	2.41318e-05	-0.00117	0.000642855
2410.62	0.000246509	-0.00125	0.000601927
2412.55	0.000555697	-0.00133	0.000696818
2414.48	0.000183075	-0.0013	0.000708536
2416.41	7.48188e-05	-0.0012	0.000738558
2418.34	0.000296901	-0.00123	0.00079916
2420.26	9.02584e-05	-0.00132	0.000706574
2422.19	0.000164296	-0.00126	0.000614814
2424.12	0.000693182	-0.00126	0.000632692
2426.05	0.000679498	-0.00143	0.000614186
2427.98	0.000584035	-0.00152	0.000693037
2429.91	0.000980712	-0.00138	0.00086663
2431.84	0.000861027	-0.00116	0.000794628
2433.76	0.00034855	-0.000921363	0.000588827
2435.69	0.00045635	-0.000744596	0.000554769
2437.62	0.000500163	-0.000748485	0.000525657
2439.55	7.88655e-05	-0.000806311	0.000428824
2441.48	0.000195973	-0.000706358	0.000489719
2443.41	0.000558638	-0.000619625	0.00058836
2445.34	0.000420694	-0.000662941	0.000584457
2447.26	0.000535565	-0.000661672	0.00063741
2449.19	0.000804033	-0.000654215	0.000638299
2451.12	0.000458525	-0.000722339	0.000503014
2453.05	0.000392696	-0.000786713	0.000517732
2454.98	0.00086234	-0.000817254	0.000634511
2456.91	0.000775259	-0.000733276	0.000560599
2458.83	0.000620697	-0.000605701	0.000462882
2460.76	0.00108	-0.000702965	0.000511652
2462.69	0.00107	-0.000849465	0.000441092
2464.62	0.0006105	-0.000736511	0.000306231
2466.55	0.00071685	-0.000652688	0.000461148
2468.48	0.000798687	-0.000723028	0.000665515
2470.41	0.000490025	-0.00064479	0.000587163
2472.33	0.000707311	-0.000531463	0.000470515
2474.26	0.00103	-0.000635901	0.000358845
2476.19	0.00073423	-0.000815123	9.88786e-05
2478.12	0.000708717	-0.000943375	-1.03189e-05
2480.05	0.00103	-0.000980138	9.7424e-05
2481.98	0.000796076	-0.000774331	0.000144195
2483.91	0.000599874	-0.000397994	0.000217368
2485.83	0.000840852	-0.000236262	0.000352465
2487.76	0.000722058	-0.000343165	0.000339409
2489.69	0.000529667	-0.0003328	0.000303698
2491.62	0.000765497	-0.000110193	0.000348501
2493.55	0.000695754	-2.20729e-05	0.000258116
2495.48	0.000378828	-0.000118953	0.000154429
2497.4	0.000554979	-0.000106855	0.000249606
2499.33	0.000676694	8.93089e-05	0.000248844
2501.26	0.00033932	0.000383312	0.000102017
2503.19	0.000274727	0.000632837	0.000177405
2505.12	0.000343002	0.000664345	0.000336103
2507.05	0.000175889	0.000545653	0.000374882
2508.97	0.000474756	0.000470349	0.000512156
2510.9	0.000864543	0.000426489	0.000566156
2512.83	0.000482198	0.000340052	0.000313847
2514.76	0.000315153	0.00031105	0.000183621
2516.69	0.000772706	0.000386958	0.000318029
2518.62	0.000725369	0.000531225	0.000349298
2520.55	0.000516451	0.000761073	0.000360638
2522.47	0.000845061	0.000919522	0.000512951
2524.4	0.000784424	0.000810917	0.000514267
2526.33	0.000425702	0.000614776	0.000453606
2528.26	0.000775253	0.000575619	0.000587429
2530.19	0.00104	0.000537383	0.000560941
2532.12	0.000580324	0.000478282	0.000298315
2534.05	0.000331313	0.000478772	0.000268475
2535.97	0.000206439	0.000367225	0.000366055
2537.9	-0.000184091	0.000170404	0.000263008
2539.83	-0.000155922	0.000141215	0.000245154
2541.76	-4.47656e-05	0.000186074	0.000434604
2543.69	-0.000588508	6.50152e-05	0.000483976
2545.62	-0.00106	-0.000252871	0.000446156
2547.55	-0.00117	-0.000678966	0.000459726
2549.47	-0.00155	-0.000943552	0.000301147
2551.4	-0.00168	-0.0009094	0.000164453
2553.33	-0.00102	-0.000874719	0.000316635
2555.26	-0.000614284	-0.000899897	0.000344975
2557.19	-0.000635642	-0.000694991	0.00014323
2559.12	-0.000233769	-0.000328994	0.000132781
2561.05	5.60786e-05	-0.000149554	0.000178948
2562.97	-0.000227116	-0.000183334	0.000119584
2564.9	-0.00015623	-0.000221941	0.000279013
2566.83	0.000185389	-0.000291172	0.000493107
2568.76	2.42741e-05	-0.000363172	0.000387789
2570.69	-5.09188e-05	-0.000233494	0.000328341
2572.61	0.000250014	2.87401e-05	0.000502462
2574.54	0.000222364	0.000107803	0.000490897
2576.47	0.000116298	-5.22789e-05	0.00038009
2578.4	0.000263162	-0.000162203	0.000358091
2580.33	4.77687e-05	-6.80244e-05	0.000132293
2582.26	-0.00023851	0.000165852	-9.10213e-05
2584.19	9.19923e-05	0.000392003	8.77648e-05
2586.11	0.000331539	0.000358555	0.000261061
2588.04	0.000252982	8.52543e-05	0.000173723
2589.97	0.00051263	-0.000106738	0.000203081
2591.9	0.000614153	-7.2743e-05	0.00025613
2593.83	0.000226187	7.09202e-05	0.00013289
2595.76	0.000141164	0.000110676	0.000150796
2597.69	0.000321083	-3.24884e-05	0.000229388
2599.61	0.000238064	-0.000115604	9.28226e-05
2601.54	0.000317149	-2.9406e-05	5.15099e-05
2603.47	0.000527566	-0.000105485	0.000154143
2605.4	0.000214836	-0.000439828	-4.85213e-06
2607.33	-9.68372e-05	-0.000607192	-0.000204
2609.26	3.63612e-05	-0.000466348	-9.59369e-05
2611.19	1.82997e-05	-0.000337004	-2.99689e-05
2613.11	-1.36281e-05	-0.000318481	-7.12643e-05
2615.04	0.000286455	-0.000323273	4.70412e-05
2616.97	0.000251034	-0.000319296	9.62512e-06
2618.9	-0.000152002	-0.000171183	-0.000228022
2620.83	-0.000128968	0.000149352	-0.000158887
2622.76	6.68897e-05	0.000432416	3.61496e-05
2624.68	-2.65247e-05	0.00054298	2.90942e-05
2626.61	-4.79565e-05	0.000464914	9.75423e-05
2628.54	-4.30112e-05	0.000163787	0.00013384
2630.47	-0.000192235	-0.000121179	-0.000113385
2632.4	-2.45753e-05	-8.42558e-05	-0.000148437
2634.33	0.000290208	0.00013281	0.000151521
2636.26	0.000160072	0.000325194	0.000195698
2638.18	0.000100257	0.00035888	5.484e-05
2640.11	0.000332237	0.000130869	4.68048e-05
2642.04	3.36936e-05	-0.00010136	-8.88471e-05
2643.97	-0.000407303	-0.000173393	-0.000281337
2645.9	-8.04665e-05	-0.000256079	-0.000210575
2647.83	0.000317667	-0.000327217	-0.000207277
2649.76	0.000337967	-0.000258913	-0.000399962
2651.68	0.000485459	-0.000225629	-0.000309037
2653.61	0.000441926	-0.000294613	-8.64251e-05
2655.54	3.13272e-05	-0.000284569	-8.84169e-05
2657.47	-0.000150225	-0.000255594	-4.23469e-06
2659.4	-0.00028112	-0.000292693	7.86775e-05
2661.33	-0.000565928	-0.000251661	-0.000233168
2663.26	-0.000307102	-4.50534e-05	-0.000498829
2665.18	0.000221057	8.77057e-05	-0.000411412
2667.11	3.81824e-05	-0.0001023	-0.000371833
2669.04	-0.000272798	-0.000324775	-0.000339646
2670.97	-4.81187e-05	-0.000229247	-0.000192344
2672.9	5.89968e-05	0.000127862	-0.000335745
2674.83	-1.98598e-05	0.000602195	-0.00056911
2676.75	7.24229e-05	0.00102	-0.000298416
2678.68	1.25195e-05	0.0011	7.68654e-05
2680.61	-5.93559e-05	0.00075068	8.45765e-05
2682.54	0.000248561	0.000218282	0.000100196
2684.47	0.000253192	-0.000101159	0.000147858
2686.4	-0.000338173	-0.000103151	-4.68466e-05
2688.32	-0.000509008	-1.64845e-05	-0.000178824
2690.25	-0.000109348	-3.62226e-05	-0.000168782
2692.18	0.000109058	-0.000109434	-0.000309573
2694.11	0.000252936	-0.000162854	-0.000352417
2696.04	0.000371908	-0.000273393	-0.000193513
2697.97	4.35568e-05	-0.000373464	-0.000286781
2699.9	-0.000299272	-0.000297028	-0.000408744
2701.82	-0.000329664	-0.000200878	-0.000199594
2703.75	-0.000540864	-0.000403065	-0.000156826
2705.68	-0.000712196	-0.000706014	-0.00033496
2707.61	-0.000492336	-0.000653758	-0.0003082
2709.54	-0.000442816	-0.000442876	-0.000346486
2711.47	-0.000475808	-0.00045913	-0.000582204
2713.4	-0.000117457	-0.00059623	-0.000576625
2715.32	-5.20543e-05	-0.000656741	-0.000507761
2717.25	-0.000555754	-0.000571205	-0.000722167
2719.18	-0.000726205	-0.000336477	-0.000824336
2721.11	-0.000488083	-4.07787e-05	-0.000682192
2723.04	-0.000487245	0.000349964	-0.000620525
2724.97	-0.000545188	0.000734129	-0.000504449
2726.89	-0.000455945	0.00057638	-0.000302613
2728.82	-0.000462447	-9.65248e-05	-0.00043682
2730.75	-0.000261108	-0.000596842	-0.000626697
2732.68	0.000155601	-0.000617113	-0.000401501
2734.61	7.31083e-05	-0.000311218	-0.000246207
2736.54	-0.000248218	-7.5571e-05	-0.000355848
2738.47	-0.000206945	-0.000213196	-0.000303122
2740.39	-0.000279449	-0.00055056	-0.000303235
2742.32	-0.000599455	-0.000702221	-0.000574582
2744.25	-0.000539356	-0.000549164	-0.00062747
2746.18	-0.000292061	-0.000258591	-0.00040769
2748.11	-0.000321136	-4.0206e-05	-0.000343601
2750.04	-0.000365515	-5.97967e-05	-0.000369814
2751.97	-0.000446239	-0.000377699	-0.000372028
2753.89	-0.000689437	-0.000721496	-0.000533049
2755.82	-0.000621471	-0.000699286	-0.000680174
2757.75	-0.000410537	-0.000464248	-0.000639735
2759.68	-0.000649336	-0.000500424	-0.000702536
2761.61	-0.000895057	-0.000714632	-0.000829041
2763.54	-0.000804789	-0.000816757	-0.000700773
2765.47	-0.000923602	-0.000914972	-0.00056935
2767.39	-0.00108	-0.000923428	-0.000557169
2769.32	-0.000806163	-0.000626596	-0.000311826
2771.25	-0.000591455	-8.7218e-05	-5.46168e-05
2773.18	-0.000596265	0.000460952	-3.89392e-05
2775.11	-0.000445934	0.000556322	2.85001e-05
2777.04	-0.000498911	0.000119272	3.24755e-05
2778.97	-0.000854577	-0.000373366	-0.000239239
2780.89	-0.000828399	-0.000735597	-0.000456339
2782.82	-0.000542546	-0.00094224	-0.000537812
2784.75	-0.000574408	-0.000822785	-0.000714433
2786.68	-0.000681636	-0.000340796	-0.000816606
2788.61	-0.000625056	0.000219195	-0.000716744
2790.54	-0.000604388	0.000401531	-0.000662056
2792.46	-0.000559485	0.000203521	-0.000552747
2794.39	-0.000401629	0.000199527	-0.000185666
2796.32	-0.000326912	0.000594468	-5.03981e-06
2798.25	-0.000288339	0.000812385	-0.000142985
2800.18	-0.000200139	0.000440153	-0.00012947
2802.11	-0.000282328	-0.000110887	-0.000110658
2804.03	-0.000307523	-0.000242463	-0.00029553
2805.96	0.000121502	0.00016986	-0.000251981
2807.89	0.000607065	0.000754971	-5.20824e-05
2809.82	0.000755452	0.00093327	-0.000156492
2811.75	0.000745971	0.000525519	-0.000300964
2813.68	0.000544439	-5.59359e-05	-0.000181606
2815.61	0.000196714	-0.000296497	-0.000135667
2817.53	0.000170775	-6.30857e-05	-0.000206471
2819.46	0.000438783	0.000283546	-0.000190484
2821.39	0.000521311	0.000368793	-0.000291948
2823.32	0.000299249	0.000280207	-0.0003794
2825.25	2.44719e-05	0.000196155	-0.000151184
2827.18	-8.61842e-05	0.000146266	-9.06656e-06
2829.11	-9.75753e-06	0.000266339	-0.000125518
2831.03	0.00011015	0.000583682	-8.72727e-05
2832.96	3.81081e-05	0.00086093	3.86724e-05
2834.89	-0.000157918	0.00115	4.19493e-06
2836.82	-0.000285916	0.00159	1.86091e-06
2838.75	-0.000495157	0.00161	-1.87081e-05
2840.68	-0.000632404	0.000889685	-0.000205671
2842.61	-0.000298961	0.000305318	-0.000176067
2844.53	0.000143435	0.000476815	0.000119994
2846.46	0.0002556	0.000917941	0.000230602
2848.39	0.00029168	0.000967455	0.000260959
2850.32	0.000264308	0.000717955	0.00040892
2852.25	5.46118e-05	0.000686137	0.000316311
2854.18	0.000100627	0.000859038	0.000155651
2856.11	0.000489038	0.00101	0.000490266
2858.03	0.000735194	0.00123	0.000908541
2859.96	0.000895959	0.0014	0.000923973
2861.89	0.0012	0.00127	0.000863234
2863.82	0.0014	0.00107	0.000823468
2865.75	0.00155	0.00106	0.00066919
2867.68	0.00185	0.00113	0.000663909
2869.6	0.00209	0.00139	0.000933743
2871.53	0.00232	0.00202	0.00119
2873.46	0.00268	0.00243	0.00126
2875.39	0.00281	0.00207	0.00113
2877.32	0.00277	0.00142	0.000820913
2879.25	0.00307	0.00108	0.000587095
2881.18	0.0035	0.00116	0.00065727
2883.1	0.00363	0.00141	0.000783156
2885.03	0.00374	0.00166	0.000801126
2886.96	0.00392	0.00179	0.000936651
2888.89	0.00398	0.0017	0.00103
2890.82	0.00403	0.00158	0.00090692
2892.75	0.00404	0.00188	0.000901494
2894.68	0.00388	0.00253	0.000987923
2896.6	0.0038	0.00277	0.000847325
2898.53	0.00392	0.00243	0.000783074
2900.46	0.00403	0.00215	0.000969397
2902.39	0.00414	0.00232	0.00105
2904.32	0.00444	0.0028	0.00109
2906.25	0.00486	0.00342	0.00132
2908.17	0.00536	0.00438	0.00156
2910.1	0.00604	0.00574	0.00179
2912.03	0.00692	0.00715	0.00215
2913.96	0.00784	0.00818	0.00255
2915.89	0.00847	0.00867	0.00279
2917.82	0.00845	0.00856	0.00278
2919.74	0.0078	0.00774	0.00251
2921.67	0.00713	0.00661	0.00221
2923.6	0.00682	0.00562	0.00221
2925.53	0.00652	0.00499	0.00252
2927.46	0.00617	0.00493	0.00292
2929.39	0.0059	0.00504	0.00315
2931.32	0.00557	0.00455	0.00299
2933.24	0.00534	0.00357	0.00264
2935.17	0.00559	0.00282	0.00257
2937.1	0.00608	0.00261	0.00269
2939.03	0.00626	0.00281	0.00264
2940.96	0.00612	0.00334	0.00268
2942.89	0.00599	0.00408	0.00307
2944.82	0.00595	0.00449	0.00344
2946.74	0.00607	0.00421	0.00356
2948.67	0.00622	0.00368	0.00361
2950.6	0.00615	0.00364	0.00361
2952.53	0.00594	0.00375	0.00349
2954.46	0.00584	0.00323	0.00339
2956.39	0.00587	0.00258	0.00325
2958.32	0.00624	0.00268	0.00306
2960.24	0.00727	0.00387	0.00322
2962.17	0.00892	0.00607	0.0036
2964.1	0.0116	0.00912	0.00366
2966.03	0.01632	0.01372	0.00364
2967.96	0.02331	0.02072	0.00389
2969.89	0.03193	0.0299	0.00404
2971.81	0.04155	0.04011	0.00398
2973.74	0.05089	0.04927	0.00394
2975.67	0.0579	0.05514	0.00401
2977.6	0.06102	0.05675	0.00433
2979.53	0.05958	0.05422	0.00474
2981.46	0.05417	0.04821	0.00477
2983.39	0.04672	0.04035	0.00446
2985.31	0.03918	0.03265	0.00436
2987.24	0.03257	0.02652	0.00443
2989.17	0.0272	0.0225	0.0043
2991.1	0.02319	0.01998	0.00422
2993.03	0.02033	0.0176	0.00437
2994.96	0.01816	0.01522	0.00449
2996.89	0.01624	0.01359	0.00451
2998.81	0.01443	0.01238	0.00451
3000.74	0.01291	0.01101	0.00442
3002.67	0.01189	0.00964	0.00436
3004.6	0.01123	0.00854	0.00447
3006.53	0.01058	0.00809	0.00462
3008.46	0.00973	0.00841	0.00476
3010.39	0.00887	0.00902	0.005
3012.31	0.00837	0.00944	0.00526
3014.24	0.00823	0.00941	0.00532
3016.17	0.00792	0.00881	0.00521
3018.1	0.00732	0.00779	0.0051
3020.03	0.00681	0.00673	0.00505
3021.96	0.0064	0.00594	0.0051
3023.88	0.00603	0.00545	0.00514
3025.81	0.00579	0.00516	0.00503
3027.74	0.00566	0.00515	0.00507
3029.67	0.00549	0.00533	0.00545
3031.6	0.00535	0.00548	0.00587
3033.53	0.00537	0.00558	0.00613
3035.45	0.00534	0.0055	0.00627
3037.38	0.00514	0.00534	0.00629
3039.31	0.00509	0.00549	0.00629
3041.24	0.00524	0.00579	0.00636
3043.17	0.00535	0.00574	0.0064
3045.1	0.00541	0.00536	0.00625
3047.03	0.0054	0.00502	0.00608
3048.95	0.00522	0.00494	0.0061
3050.88	0.00496	0.00489	0.00627
3052.81	0.00465	0.00468	0.0066
3054.74	0.00421	0.00444	0.00698
3056.67	0.00389	0.00399	0.00711
3058.6	0.00413	0.00314	0.00699
3060.53	0.00464	0.00251	0.00696
3062.45	0.00492	0.00269	0.00701
3064.38	0.00485	0.00343	0.007
3066.31	0.00457	0.00411	0.0071
3068.24	0.00432	0.00419	0.00728
3070.17	0.00417	0.00381	0.00745
3072.1	0.00399	0.00357	0.00771
3074.03	0.00375	0.00375	0.00803
3075.95	0.00364	0.0044	0.00829
3077.88	0.00382	0.00506	0.00851
3079.81	0.00407	0.0051	0.00865
3081.74	0.00411	0.00487	0.00866
3083.67	0.00402	0.00474	0.0086
3085.6	0.00395	0.00441	0.00858
3087.52	0.00381	0.00409	0.00867
3089.45	0.00373	0.00396	0.00886
3091.38	0.00375	0.0035	0.00903
3093.31	0.00353	0.00268	0.00901
3095.24	0.00309	0.00224	0.00897
3097.17	0.00289	0.0026	0.00913
3099.09	0.00299	0.00326	0.00934
3101.02	0.00313	0.00341	0.00938
3102.95	0.00315	0.00304	0.00945
3104.88	0.00322	0.003	0.00968
3106.81	0.00349	0.0036	0.00992
3108.74	0.00373	0.004	0.01011
3110.67	0.00379	0.00389	0.01022
3112.59	0.00389	0.00402	0.01034
3114.52	0.00401	0.00456	0.01055
3116.45	0.00379	0.00488	0.01087
3118.38	0.00341	0.00466	0.01119
3120.31	0.00324	0.00395	0.0113
3122.24	0.00323	0.00302	0.01123
3124.17	0.00319	0.00237	0.01111
3126.09	0.00324	0.00225	0.01117
3128.02	0.00342	0.00246	0.01142
3129.95	0.00342	0.00248	0.01152
3131.88	0.00315	0.00206	0.01145
3133.81	0.00271	0.0018	0.01162
3135.74	0.00234	0.0022	0.01206
3137.66	0.00247	0.0028	0.01249
3139.59	0.00282	0.0028	0.01278
3141.52	0.0027	0.00205	0.0129
3143.45	0.00225	0.00123	0.0129
3145.38	0.00202	0.00101	0.013
3147.31	0.00213	0.0015	0.0133
3149.24	0.0023	0.00225	0.01364
3151.16	0.00238	0.00255	0.01395
3153.09	0.00253	0.00207	0.01406
3155.02	0.0027	0.00132	0.01391
3156.95	0.00259	0.00102	0.01389
3158.88	0.00219	0.00105	0.01413
3160.81	0.00187	0.000934467	0.01431
3162.74	0.00184	0.00061907	0.01438
3164.66	0.00177	0.000311092	0.01467
3166.59	0.00162	0.00018313	0.01508
3168.52	0.00179	0.00030356	0.01536
3170.45	0.00223	0.000528096	0.01569
3172.38	0.00246	0.000601415	0.01604
3174.31	0.00245	0.000532897	0.01613
3176.24	0.00229	0.000503756	0.01608
3178.16	0.00195	0.000517332	0.01615
3180.09	0.00193	0.000447508	0.01629
3182.02	0.00232	0.00036096	0.0165
3183.95	0.00245	0.00033922	0.01684
3185.88	0.00225	0.000425188	0.01718
3187.81	0.00224	0.000524708	0.01749
3189.74	0.00237	0.000264605	0.01793
3191.66	0.00201	-0.000318997	0.01833
3193.59	0.00144	-0.000792945	0.0185
3195.52	0.0014	-0.00084428	0.01866
3197.45	0.00165	-0.000445111	0.01895
3199.38	0.00169	-1.3877e-05	0.01928
3201.31	0.00173	0.000282236	0.01959
3203.23	0.00184	0.000640424	0.01985
3205.16	0.00187	0.000852187	0.01997
3207.09	0.00184	0.00052247	0.02001
3209.02	0.00164	-4.73149e-05	0.02014
3210.95	0.00153	-4.63799e-05	0.02038
3212.88	0.00174	0.000480574	0.02074
3214.8	0.00197	0.000730503	0.02116
3216.73	0.00201	0.000516442	0.0214
3218.66	0.00203	0.000170445	0.0215
3220.59	0.00196	-0.000130312	0.02162
3222.52	0.00184	-0.000323883	0.02167
3224.45	0.00186	-0.000260669	0.02173
3226.38	0.00194	4.51744e-05	0.02203
3228.3	0.00198	0.00047684	0.02242
3230.23	0.00193	0.00119	0.02285
3232.16	0.00184	0.00196	0.02341
3234.09	0.00193	0.00195	0.02381
3236.02	0.00215	0.00111	0.02401
3237.95	0.00218	0.000267261	0.02428
3239.88	0.00198	7.2535e-05	0.02448
3241.8	0.00189	0.0005446	0.02451
3243.73	0.00202	0.00143	0.02459
3245.66	0.0021	0.00196	0.02468
3247.59	0.00193	0.00152	0.02461
3249.52	0.00163	0.000762424	0.02466
3251.45	0.00159	0.000527014	0.02499
3253.38	0.00198	0.0005125	0.02522
3255.3	0.00235	0.000215618	0.0252
3257.23	0.00226	-0.000239711	0.02519
3259.16	0.00187	-0.00033595	0.02531
3261.09	0.00174	-1.24164e-05	0.02543
3263.02	0.00188	0.000136713	0.02559
3264.95	0.00195	2.95625e-05	0.02585
3266.88	0.00189	0.000373388	0.02619
3268.8	0.00189	0.00129	0.02658
3270.73	0.00199	0.00194	0.02686
3272.66	0.00197	0.00186	0.02689
3274.59	0.0018	0.00134	0.02683
3276.52	0.00163	0.000619305	0.02689
3278.45	0.00152	5.76189e-05	0.02707
3280.37	0.00175	4.988e-05	0.02737
3282.3	0.00231	0.00039683	0.02774
3284.23	0.00267	0.000489566	0.02798
3286.16	0.00264	0.000285884	0.02793
3288.09	0.00242	0.000423335	0.02786
3290.02	0.00216	0.00113	0.02804
3291.95	0.00189	0.00186	0.02845
3293.87	0.00153	0.00202	0.02887
3295.8	0.00123	0.0016	0.02904
3297.73	0.00144	0.00108	0.02899
3299.66	0.0021	0.00104	0.02895
3301.59	0.00267	0.00153	0.02914
3303.52	0.00285	0.0021	0.0296
3305.45	0.00271	0.00223	0.03003
3307.37	0.00258	0.00175	0.03027
3309.3	0.00259	0.0011	0.0304
3311.23	0.00257	0.000670008	0.0305
3313.16	0.00243	0.000401973	0.03056
3315.09	0.00221	-8.12087e-05	0.03054
3317.02	0.00212	-0.000624809	0.03064
3318.94	0.00233	-0.000676928	0.03102
3320.87	0.0027	-0.000309361	0.03147
3322.8	0.00312	3.54872e-05	0.03174
3324.73	0.00344	0.000135847	0.03183
3326.66	0.00339	-4.56769e-06	0.03176
3328.59	0.00296	-0.000153379	0.0318
3330.51	0.00246	-0.000181652	0.03209
3332.44	0.00229	-0.000186254	0.03241
3334.37	0.00254	-8.02768e-05	0.03263
3336.3	0.0028	0.000303509	0.03288
3338.23	0.00282	0.000700432	0.03317
3340.16	0.00288	0.000839224	0.0334
3342.09	0.00302	0.000786835	0.03362
3344.01	0.00288	0.000529801	0.0339
3345.94	0.00259	0.000339514	0.03416
3347.87	0.00276	0.000569778	0.03448
3349.8	0.00317	0.000817074	0.0349
3351.73	0.00308	0.000714457	0.03512
3353.66	0.00261	0.000574987	0.03508
3355.59	0.00249	0.000606323	0.03509
3357.51	0.00273	0.000688815	0.03537
3359.44	0.00276	0.000672286	0.03591
3361.37	0.0025	0.000568155	0.03636
3363.3	0.00253	0.000837312	0.03657
3365.23	0.00292	0.00157	0.0368
3367.16	0.00334	0.00204	0.03712
3369.09	0.00367	0.00184	0.03738
3371.01	0.00384	0.00115	0.0375
3372.94	0.00384	0.00047825	0.03755
3374.87	0.00388	0.000413695	0.0377
3376.8	0.00384	0.000654112	0.03797
3378.73	0.00357	0.000501054	0.03827
3380.66	0.0034	8.46879e-05	0.03849
3382.58	0.00327	-7.80506e-05	0.03868
3384.51	0.00307	1.51853e-05	0.03902
3386.44	0.00329	0.000211883	0.03952
3388.37	0.00382	0.000615151	0.03998
3390.3	0.00417	0.00107	0.04015
3392.23	0.00453	0.00123	0.04007
3394.16	0.005	0.00114	0.04007
3396.08	0.00503	0.00111	0.04033
3398.01	0.00455	0.00144	0.04074
3399.94	0.00433	0.00178	0.04106
3401.87	0.00471	0.00151	0.0411
3403.8	0.00518	0.000807196	0.04102
3405.73	0.00528	0.00044483	0.04113
3407.66	0.00508	0.000508165	0.04137
3409.58	0.00486	0.000490121	0.04164
3411.51	0.00482	0.00037336	0.04191
3413.44	0.00492	0.000260767	0.04201
3415.37	0.00484	4.01984e-05	0.04192
3417.3	0.00453	-0.000169382	0.04202
3419.23	0.00436	-0.000331907	0.04235
3421.16	0.00465	-0.000515398	0.04247
3423.08	0.00518	-0.000619595	0.04229
3425.01	0.00548	-0.000612432	0.04215
3426.94	0.00547	-0.00044333	0.04213
3428.87	0.00524	-0.000182462	0.04226
3430.8	0.00492	-4.22372e-05	0.04249
3432.72	0.00484	5.97927e-06	0.04262
3434.65	0.00498	8.19286e-06	0.04264
3436.58	0.00506	-0.000146979	0.04263
3438.51	0.00501	-0.000487217	0.04247
3440.44	0.00473	-0.000858848	0.04219
3442.37	0.00435	-0.00109	0.04214
3444.3	0.00413	-0.00114	0.04242
3446.22	0.00411	-0.00126	0.0426
3448.15	0.00434	-0.00151	0.04233
3450.08	0.00467	-0.00157	0.04186
3452.01	0.00463	-0.00146	0.04174
3453.94	0.00409	-0.00131	0.04228
3455.87	0.00359	-0.00112	0.04297
3457.8	0.00372	-0.00109	0.0431
3459.72	0.0044	-0.00117	0.04266
3461.65	0.00492	-0.00106	0.04214
3463.58	0.00498	-0.000783548	0.04209
3465.51	0.00479	-0.000434529	0.04245
3467.44	0.00475	-0.000114085	0.04258
3469.37	0.00487	-0.000129145	0.04216
3471.3	0.00488	-0.000534484	0.04151
3473.22	0.00502	-0.000871431	0.04112
3475.15	0.00536	-0.00102	0.04104
3477.08	0.00555	-0.00111	0.04104
3479.01	0.00554	-0.00129	0.04111
3480.94	0.0054	-0.00171	0.04126
3482.87	0.00523	-0.00156	0.04133
3484.8	0.00533	-0.000662682	0.04127
3486.72	0.00565	-0.000381397	0.04115
3488.65	0.00568	-0.000917077	0.041
3490.58	0.00539	-0.00123	0.04086
3492.51	0.00522	-0.00125	0.04084
3494.44	0.00523	-0.00144	0.04086
3496.37	0.00522	-0.00159	0.04058
3498.29	0.00512	-0.00139	0.04015
3500.22	0.00518	-0.00111	0.03993
3502.15	0.00546	-0.00114	0.03982
3504.08	0.00542	-0.00139	0.03962
3506.01	0.00498	-0.00138	0.03948
3507.94	0.00486	-0.00134	0.03933
3509.86	0.00537	-0.00142	0.03899
3511.79	0.00589	-0.00116	0.03861
3513.72	0.00588	-0.000748715	0.03835
3515.65	0.00563	-0.000715689	0.03806
3517.58	0.0055	-0.000990503	0.03777
3519.51	0.00543	-0.00108	0.03769
3521.44	0.00533	-0.000843084	0.03771
3523.36	0.00514	-0.00082153	0.03751
3525.29	0.00489	-0.00117	0.03703
3527.22	0.00476	-0.00152	0.03643
3529.15	0.00484	-0.00168	0.03594
3531.08	0.00503	-0.0017	0.03569
3533.01	0.00529	-0.00164	0.03565
3534.94	0.00548	-0.00133	0.03563
3536.86	0.00547	-0.000911264	0.03535
3538.79	0.00554	-0.000699743	0.03489
3540.72	0.00578	-0.000476354	0.03457
3542.65	0.00601	-8.90819e-05	0.03433
3544.58	0.00605	-2.05625e-05	0.03384
3546.51	0.00557	-0.000541093	0.03314
3548.43	0.00497	-0.00111	0.03269
3550.36	0.00487	-0.0014	0.03241
3552.29	0.00512	-0.00148	0.03208
3554.22	0.00543	-0.00136	0.0319
3556.15	0.00565	-0.00104	0.03187
3558.08	0.00573	-0.000876045	0.03178
3560.01	0.0057	-0.00116	0.03165
3561.93	0.00542	-0.00146	0.03161
3563.86	0.00509	-0.00136	0.0315
3565.79	0.00529	-0.00161	0.03099
3567.72	0.00597	-0.00212	0.03014
3569.65	0.00617	-0.00182	0.02954
3571.58	0.00581	-0.00132	0.0292
3573.51	0.00551	-0.00127	0.02879
3575.43	0.0056	-0.00152	0.02834
3577.36	0.00585	-0.00158	0.02809
3579.29	0.00593	-0.00118	0.02809
3581.22	0.00577	-0.00064975	0.02811
3583.15	0.00566	-0.000327225	0.028
3585.08	0.0059	-0.000142983	0.02788
3587.01	0.00617	-0.000315199	0.02752
3588.93	0.00586	-0.000776245	0.02684
3590.86	0.00563	-0.000770268	0.02659
3592.79	0.00592	-0.000584717	0.02669
3594.72	0.00634	-0.000829973	0.02658
3596.65	0.00662	-0.0013	0.02625
3598.58	0.0069	-0.00154	0.0259
3600.51	0.00693	-0.00136	0.02545
3602.43	0.00647	-0.000856293	0.02502
3604.36	0.00585	-0.000260885	0.02468
3606.29	0.00548	0.000129882	0.02417
3608.22	0.00555	-9.6415e-06	0.02352
3610.15	0.00598	-0.000233368	0.02329
3612.08	0.00635	-0.000461198	0.02353
3614	0.00649	-0.000878565	0.02387
3615.93	0.00674	-0.00101	0.02412
3617.86	0.00705	-0.00112	0.02409
3619.79	0.00718	-0.00146	0.02371
3621.72	0.00725	-0.0014	0.02353
3623.65	0.00718	-0.00091091	0.02376
3625.57	0.00704	-0.000341648	0.02399
3627.5	0.00726	-0.000454001	0.02375
3629.43	0.00764	-0.00148	0.02298
3631.36	0.00724	-0.00177	0.02252
3633.29	0.0067	-0.00159	0.02236
3635.22	0.00679	-0.00135	0.02229
3637.15	0.00739	-0.000944006	0.02218
3639.07	0.00784	-0.000705724	0.02195
3641	0.00797	-0.000517634	0.02182
3642.93	0.0079	-6.14258e-06	0.02192
3644.86	0.00731	0.000717081	0.02241
3646.79	0.00639	0.00118	0.02306
3648.72	0.00673	0.000483705	0.02274
3650.65	0.00829	-0.00102	0.02164
3652.57	0.00913	-0.00111	0.02115
3654.5	0.00959	-0.00030466	0.02105
3656.43	0.00974	0.000119665	0.02103
3658.36	0.00942	8.71758e-05	0.02089
3660.29	0.00913	0.000181452	0.02064
3662.22	0.00912	0.000496233	0.02041
3664.14	0.00914	0.00111	0.02012
3666.07	0.00892	0.00188	0.01972
3668	0.00879	0.00209	0.01923
3669.93	0.00933	0.00128	0.01863
3671.86	0.01007	0.00107	0.01841
3673.79	0.01036	0.00162	0.01832
3675.72	0.01	0.00105	0.01721
3677.64	0.00957	2.47791e-05	0.01606
3679.57	0.00955	0.000139665	0.01569
3681.5	0.00957	0.000939758	0.01546
3683.43	0.00935	0.00146	0.01534
3685.36	0.00883	0.00131	0.01535
3687.29	0.00805	0.000765508	0.01514
3689.22	0.00775	5.57281e-05	0.01419
3691.14	0.00838	-0.00027627	0.01303
3693.07	0.00896	-4.39859e-05	0.01243
3695	0.00899	0.000427908	0.01215
3696.93	0.00861	0.00102	0.01199
3698.86	0.00823	0.00149	0.01179
3700.79	0.00809	0.00123	0.01124
3702.72	0.00804	0.000349195	0.01057
3704.64	0.00791	0.000165886	0.01038
3706.57	0.00778	0.000808692	0.0105
3708.5	0.00782	0.00156	0.0106
3710.43	0.00832	0.00149	0.01012
3712.36	0.00909	0.000650104	0.00875
3714.29	0.00928	0.000663244	0.00764
3716.22	0.00884	0.00149	0.00736
3718.14	0.00824	0.00232	0.0076
3720.07	0.00823	0.00266	0.00762
3722	0.00912	0.00259	0.00727
3723.93	0.00992	0.00255	0.00714
3725.86	0.00991	0.00219	0.00702
3727.78	0.00958	0.00171	0.0068
3729.71	0.00931	0.00224	0.00682
3731.64	0.00924	0.0035	0.00698
3733.57	0.00973	0.0034	0.0074
3735.5	0.01058	0.000944421	0.00778
3737.43	0.01109	-0.000133056	0.00713
3739.36	0.01137	0.00133	0.00643
3741.28	0.01131	0.00357	0.00653
3743.21	0.01059	0.00501	0.00746
3745.14	0.00958	0.00483	0.00893
3747.07	0.00926	0.00475	0.00998
3749	0.00918	0.00478	0.00998
3750.93	0.00813	0.00332	0.00826
3752.86	0.00652	0.00176	0.00589
3754.78	0.00595	0.00138	0.00446
3756.71	0.00626	0.00133	0.00391
3758.64	0.00634	0.00121	0.0037
3760.57	0.00552	0.0012	0.00337
3762.5	0.00495	0.00125	0.00309
3764.43	0.00502	0.00109	0.00299
3766.36	0.00463	0.00111	0.00285
3768.28	0.00355	0.00125	0.00235
3770.21	0.00301	0.000884364	0.0017
3772.14	0.00341	0.000510675	0.00163
3774.07	0.0039	0.000408084	0.00177
3776	0.00389	0.000183604	0.00163
3777.93	0.00337	-0.000357548	0.00136
3779.86	0.00279	-0.000814592	0.00139
3781.78	0.00255	-0.000827092	0.00172
3783.71	0.00258	-0.00108	0.00194
3785.64	0.00257	-0.00157	0.00184
3787.57	0.00227	-0.00144	0.00143
3789.5	0.002	-0.000827548	0.00107
3791.43	0.00197	-0.000234668	0.0011
3793.35	0.00178	0.000219476	0.00136
3795.28	0.00127	0.000280065	0.00162
3797.21	0.000960779	0.000137995	0.00193
3799.14	0.00163	0.000729482	0.00222
3801.07	0.00323	0.00124	0.00207
3803	0.00383	0.000971224	0.0018
3804.93	0.00292	0.00119	0.00189
3806.85	0.00189	0.00122	0.00166
3808.78	0.00134	0.000517125	0.00102
3810.71	0.000947789	0.000135962	0.000645241
3812.64	0.000810912	0.000706635	0.000643584
3814.57	0.00124	0.00162	0.000926737
3816.5	0.00175	0.00109	0.00132
3818.43	0.00211	-0.000412499	0.00157
3820.35	0.00258	-0.00141	0.0016
3822.28	0.00218	-0.00121	0.00157
3824.21	0.00156	-0.000314776	0.00155
3826.14	0.00151	0.000127031	0.00122
3828.07	0.00155	0.00021184	0.000853386
3830	0.00152	2.89944e-05	0.000909341
3831.92	0.00138	-0.000688778	0.00102
3833.85	0.00112	-0.00111	0.000715791
3835.78	0.00114	-0.000159242	0.000437653
3837.71	0.00167	0.00166	0.000665331
3839.64	0.00181	0.00231	0.000893998
3841.57	0.00116	0.00144	0.000859609
3843.49	0.000665331	-0.000179812	0.000769615
3845.42	0.000641245	-0.00132	0.000673587
3847.35	0.000698245	-0.00099622	0.000623849
3849.28	0.000793892	0.000537046	0.000707701
3851.21	0.00118	0.00287	0.000993399
3853.14	0.00121	0.00371	0.00117
3855.07	0.000175877	0.0011	0.00092984
3856.99	-0.000406596	-0.000220587	0.000706652
3858.92	-0.000343462	0.000217386	0.000599778
3860.85	-4.22449e-05	0.00111	0.000600853
3862.78	-0.000118564	0.00155	0.000633319
3864.71	-0.000521773	0.00102	0.000568726
3866.64	-0.000342075	0.000848018	0.000524901
3868.57	0.000285462	0.00198	0.000623396
3870.49	0.000518114	0.00287	0.000698886
3872.42	0.00024349	0.00194	0.000445872
3874.35	-0.000160595	5.60164e-05	2.51011e-05
3876.28	-0.00054916	-0.000453158	4.48226e-05
3878.21	-0.000541328	0.000845641	0.000398441
3880.14	-0.000111962	0.00164	0.000310306
3882.07	0.000168103	0.0008546	-0.000228313
3883.99	0.000257449	-5.38518e-05	-0.000547993
3885.92	0.000153162	-0.000628331	-0.000624499
3887.85	-0.000146947	-0.00051864	-0.000442017
3889.78	-0.000288189	-0.000315657	-0.000256657
3891.71	-0.000530579	-0.000892274	-0.000528741
3893.64	-0.000954812	-0.00117	-0.000768032
3895.57	-0.001	-0.000173829	-0.000405231
3897.49	-0.000528547	0.00171	0.000146409
3899.42	0.000184985	0.0034	0.000306539
3901.35	0.000482773	0.00361	0.000377298
3903.28	0.000284623	0.00222	0.000728412
3905.21	0.000243298	9.77424e-05	0.000678794
3907.14	0.000363186	-0.00131	0.000276373
3909.06	0.000132977	-0.00161	-4.69811e-05
3910.99	-0.000286704	-0.00139	-0.000214281
3912.92	-0.000244793	-0.000995278	-7.9496e-05
3914.85	4.77875e-05	-0.000513407	0.000299256
3916.78	-0.000162226	-0.000262328	0.000417021
3918.71	-0.00054958	-0.000496864	7.44705e-05
3920.64	-0.000536114	-0.000679512	-0.000231446
3922.56	-0.000200209	-0.000519129	-0.000215617
3924.49	0.000109979	-0.000514409	-5.17364e-05
3926.42	-0.000137565	-0.000496886	0.000134801
3928.35	-0.000695523	7.50319e-05	0.000285076
3930.28	-0.000885917	0.000498195	0.000220643
3932.21	-0.000747149	-8.34124e-05	2.86148e-05
3934.14	-0.00070216	-0.000881984	-9.86321e-05
3936.06	-0.000756133	-0.00107	-0.000315562
3937.99	-0.00101	-0.000857845	-0.000590363
3939.92	-0.00127	-0.000403172	-0.000618518
3941.85	-0.00108	-7.09429e-05	-0.000400268
3943.78	-0.000793918	-0.000211547	-0.00010137
3945.71	-0.000646535	-0.000197079	0.000138862
3947.63	-0.000301625	0.000297537	3.8246e-05
3949.56	-3.9839e-05	0.000661428	-0.000251868
3951.49	-0.000286659	0.000555606	-0.000438016
3953.42	-0.000568189	0.000364662	-0.000579715
3955.35	-0.000420444	0.000181666	-0.000501635
3957.28	-0.000153212	-0.000253564	-0.000246445
3959.2	-0.000248328	-0.000626473	-8.65595e-05
3961.13	-0.000678839	-0.000551885	3.6392e-05
3963.06	-0.00113	-0.000414002	6.71023e-06
3964.99	-0.0013	-0.00041639	-0.000308627
3966.92	-0.00111	-0.000451852	-0.000548513
3968.85	-0.00083995	-0.000536671	-0.00040799
3970.78	-0.000571687	-0.000526525	-0.000214362
3972.7	-0.000180312	-0.000451631	-0.000334352
3974.63	-7.92886e-05	-0.00071412	-0.000608139
3976.56	-0.000308448	-0.00106	-0.000820449
3978.49	-0.000284076	-0.000895854	-0.000851082
3980.42	-0.000125027	-0.00089656	-0.000755159
3982.35	-0.000328216	-0.00152	-0.000731594
3984.28	-0.000547752	-0.00175	-0.000706383
3986.2	-0.000346295	-0.00116	-0.000652002
3988.13	3.2694e-05	-0.000506042	-0.000767042
3990.06	0.000211238	-0.000403571	-0.000971841
3991.99	-3.80236e-05	-0.000731257	-0.000976216
3993.92	-0.000608708	-0.000898785	-0.000838785
3995.85	-0.00114	-0.000708554	-0.000743241
3997.78	-0.00137	-0.000469832	-0.000587212
3999.7	-0.00139	-0.000537515	-0.000468982
4001.63	-0.00137	-0.000867934	-0.000496376

## Sheet: EP
P/P0	Volume adsorbed (%)			ln(ln(P/P0)	ln(V)	ln(V)	ln(V)
	300	400	700
0	1e-08	1e-08	1e-08
0.01545	2.28121	0.5886	11.6131
0.03043	3.7612	1.02312	15.0477
0.04496	4.98204	1.30404	16.7874
0.05906	5.92064	1.81432	18.0045
0.07274	6.80652	2.0947	18.8911
0.10412	9.07563	2.96016	20.5183
0.15583	13.1277	4.73627	22.875	0.62004	2.57472	1.55525	3.13004
0.2073	18.9312	7.81332	24.7802	0.45337	2.94081	2.05583	3.21004
0.25853	26.6669	12.9058	26.196	0.30213	3.28342	2.55768	3.26561
0.30953	34.2611	21.3666	27.1743	0.1593	3.53401	3.06183	3.30227
0.3603	37.8796	30.7937	27.719
0.41085	38.807	35.5523	27.9003
0.46116	39.131	36.6212	28.0136
0.51125	39.3623	36.9227	28.1495
0.56111	39.6626	37.2239	28.2854
0.61075	39.8935	37.4323	28.2627
0.66017	39.9396	37.6868	28.3533
0.70936	40.0549	37.733	28.4438
0.75834	40.2394	37.8948	28.5116
0.8071	40.4008	38.1259	28.5343
0.85565	40.562	38.0797	28.6247
0.90398	40.6081	38.2413	28.5795
0.95209	40.7002	38.4721	28.6925
1	40.8843	38.426	28.7151
